# Supplementary material
Source: Springer Nature journal article supplement (https://www.springermedizin.de/resource/supplementary/12990_2009_246_MOESM3_ESM.pdf/9612878)

**A**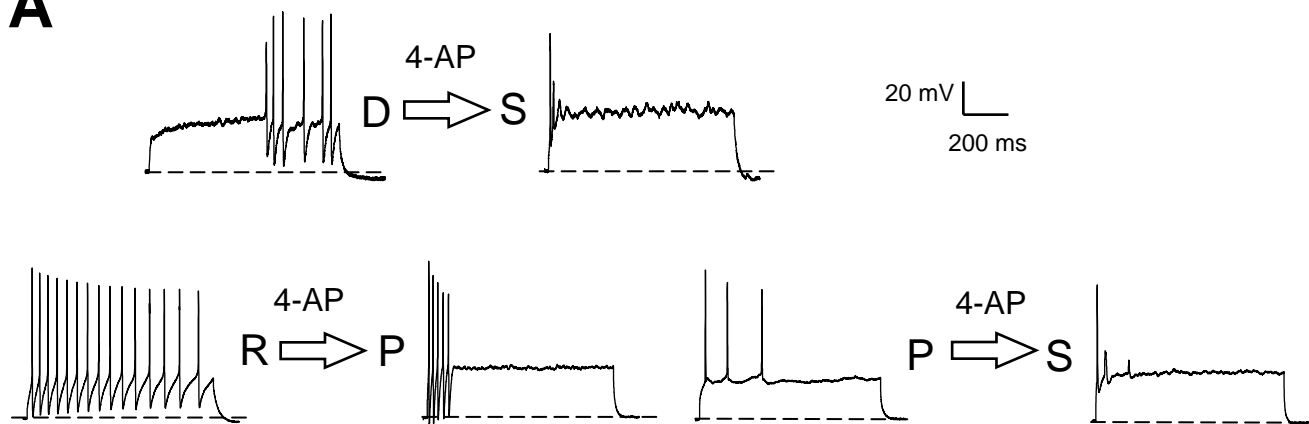**B**

Standard protocol

 $I_A$  maximization protocol $I_A$  minimization protocol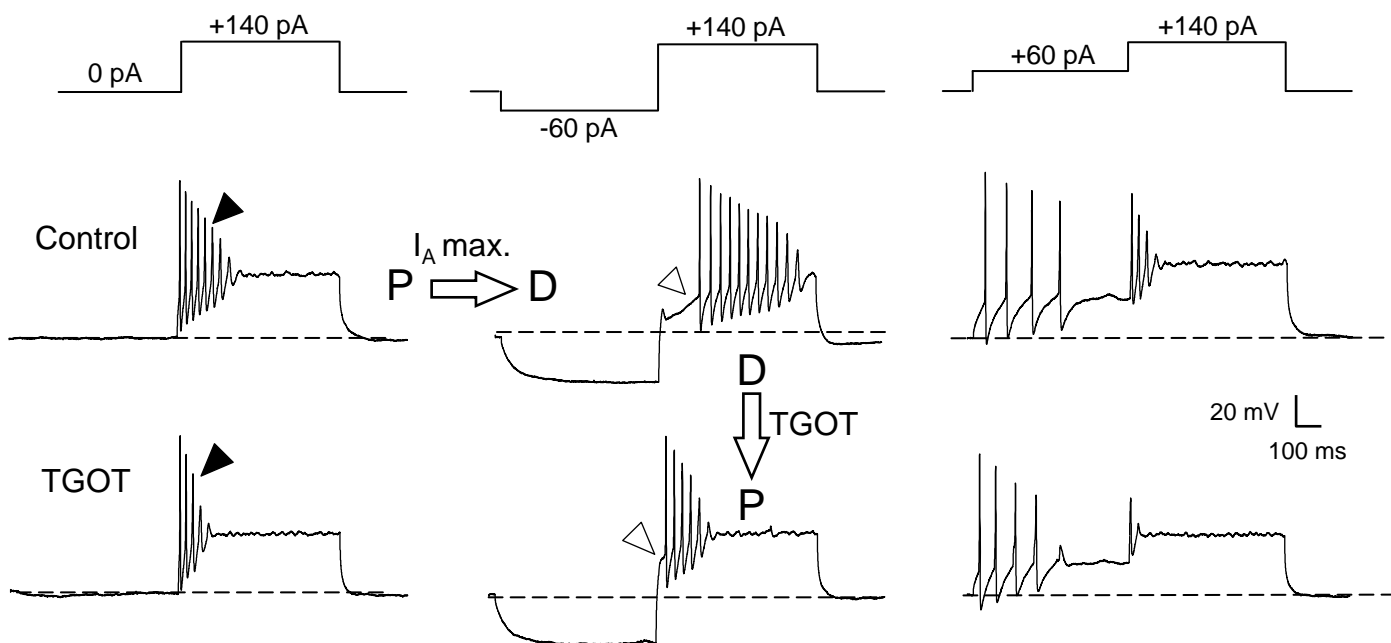**C** $I_A$  maximization protocol

+ 4AP

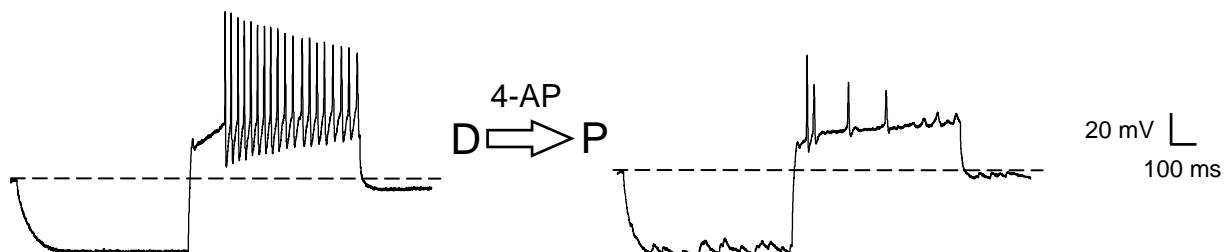

Supplement: MOESM3 [file 9612878]
